# Supplementary material for: High-quality perovskite films prepared by nucleus epitaxial growth for efficient and stable perovskite solar cells
Source: Royal Society of Chemistry journal article supplement (doi:10.1039/d2ta09108a), 2023-01-01
Supplement: d2ta09108a1.pdf [file d2ta09108a1.pdf]

## Supporting information

### High-quality perovskite films prepared by nucleus epitaxial growth for efficient and stable perovskite solar cells

Tiao Wu<sup>a</sup>, Wenxi Ji<sup>b</sup>, Longgui Zhang<sup>b</sup>, Qiaoyun Chen<sup>a</sup>, Jianfei Fu<sup>a</sup>, Jiajia Zhang<sup>a</sup>, Zelong Zhang<sup>a</sup>, Yi Zhou<sup>a,\*</sup>, Bin Dong<sup>a</sup>, Bo Song<sup>a,\*</sup>

<sup>a</sup> *Laboratory of Advanced Optoelectronic Materials, Suzhou Key Laboratory of Novel Semiconductor-optoelectronics Materials and Devices, College of Chemistry, Chemical Engineering and Materials Science, Soochow University, Suzhou 215123, China*

<sup>b</sup> *Beijing Research Institute of Chemical Industry China Petroleum & Chemical Corporation, Beijing 100013, PR China*

Tel. : +86 (0) 512 65882507; E-mail: [yizhou@suda.edu.cn](mailto:yizhou@suda.edu.cn); [songbo@suda.edu.cn](mailto:songbo@suda.edu.cn)

**Table S1.** Comparison of our device with published perovskite solar cells.

| Perovskite composition                                                          | Nucleus composition                                                                           | PCE         |           | Ref.      |
|---------------------------------------------------------------------------------|-----------------------------------------------------------------------------------------------|-------------|-----------|-----------|
|                                                                                 |                                                                                               | w/o nucleus | w nucleus |           |
| FA <sub>0.98</sub> MA <sub>0.02</sub> PbI <sub>3</sub>                          | δ-FAPbI <sub>3</sub>                                                                          | 21.53%      | 23.16%    | This work |
| (FAPbI <sub>3</sub> ) <sub>1-x</sub> (MAPbBr <sub>3</sub> ) <sub>x</sub>        | δ-CsPbI <sub>3</sub>                                                                          | 19.16%      | 20.45%    | 1         |
| FA <sub>0.91</sub> MA <sub>0.09</sub> Pb(I <sub>0.91</sub> Br <sub>0.09</sub> ) | δ-CsPbI <sub>3</sub> /δ-RbPbI <sub>3</sub>                                                    | 20.42%      | 22.30%    | 2         |
| Cs <sub>0.05</sub> FA <sub>0.95</sub> PbI <sub>3</sub>                          | CsPbBr <sub>3</sub>                                                                           | 20.30%      | 21.45%    | 3         |
| FA <sub>0.98</sub> MA <sub>0.02</sub> PbI <sub>3</sub>                          | δ-CsPbI <sub>2</sub> Br                                                                       | 20.61%      | 21.63%    | 4         |
| (FAPbI <sub>3</sub> ) <sub>0.96</sub> (MAPb <sub>3</sub> ) <sub>0.04</sub>      | Cs <sub>0.1</sub> FA <sub>0.78</sub> MA <sub>0.12</sub> Pb <sub>2.55</sub> Br <sub>0.45</sub> | 19.4%       | 21.7%     | 5         |
| FA <sub>0.75</sub> MA <sub>0.25</sub> PbI <sub>3</sub>                          | (BDA)PbI <sub>4</sub>                                                                         | 21.03%      | 23.95%    | 6         |

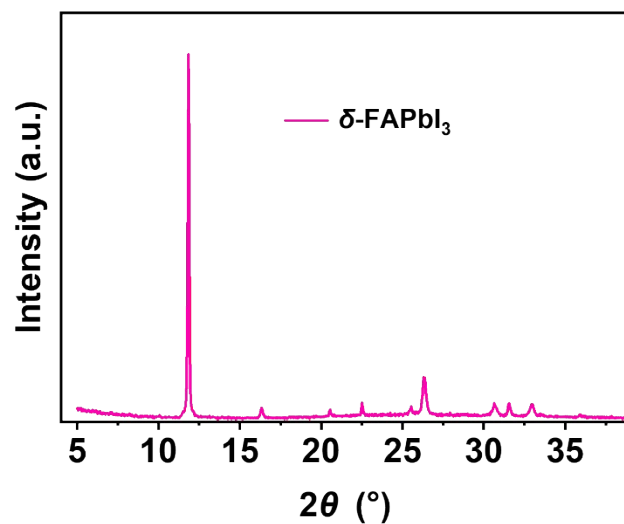

Figure S1. XRD patterns of  $\delta$ -FAPbI<sub>3</sub>.

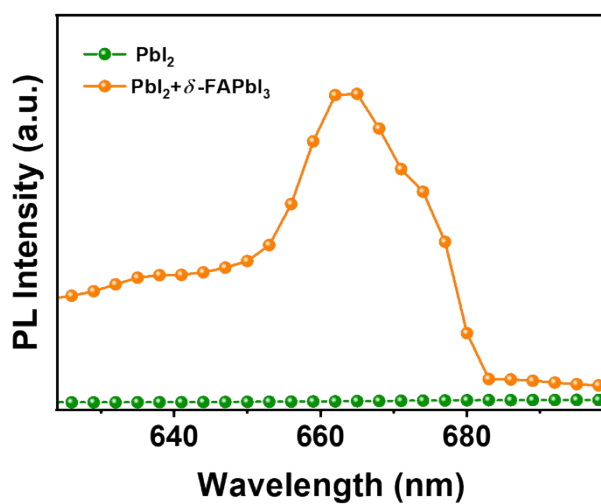

Figure S2. Steady-state PL spectra of  $\text{PbI}_2$  and  $\text{PbI}_2 + \delta\text{-FAPbI}_3$  films.

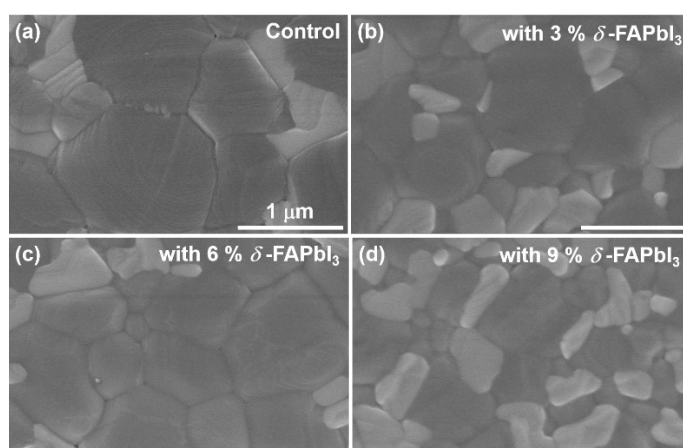

Figure S3. Top-view SEM images of perovskite films with different concentrations of  $\delta$ -FAPbI<sub>3</sub>.

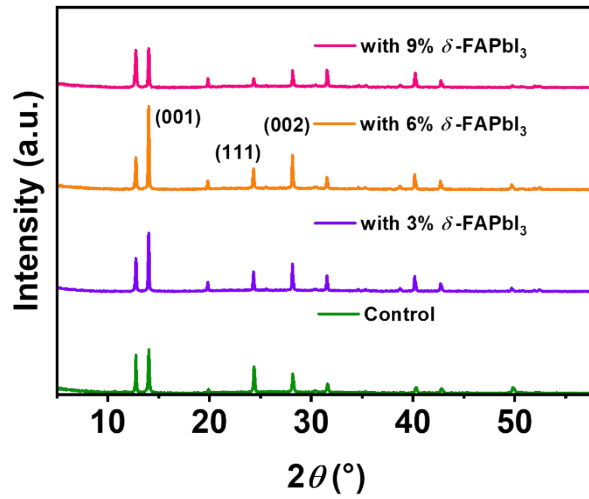

**Figure S4.** XRD patterns of the perovskite films with different amounts of pre-added  $\delta$ -FAPbI<sub>3</sub> in the precursors.

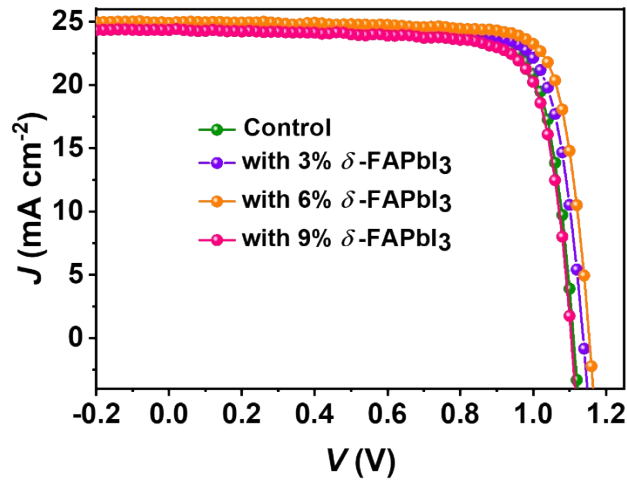

**Figure S5.**  $J$ - $V$  curves of the Pero-SCs with different amounts of pre-added  $\delta$ -FAPbI<sub>3</sub> in the precursors.

**Table S2.** Parameters of Pero-SCs based on FA<sub>1-x</sub>MA<sub>x</sub>PbI<sub>3</sub> with varying amounts of  $\delta$ -FAPbI<sub>3</sub>.

| Device                               | $V_{OC}$ (V) | $J_{SC}$ (mA cm <sup>-2</sup> ) | FF (%) | PCE (%) |
|--------------------------------------|--------------|---------------------------------|--------|---------|
| Control                              | 1.11         | 24.39                           | 79.6   | 21.53   |
| With 3% $\delta$ -FAPbI <sub>3</sub> | 1.13         | 24.67                           | 79.4   | 22.23   |
| With 6% $\delta$ -FAPbI <sub>3</sub> | 1.15         | 24.94                           | 80.7   | 23.16   |
| With 9% $\delta$ -FAPbI <sub>3</sub> | 1.10         | 24.36                           | 78.3   | 21.01   |

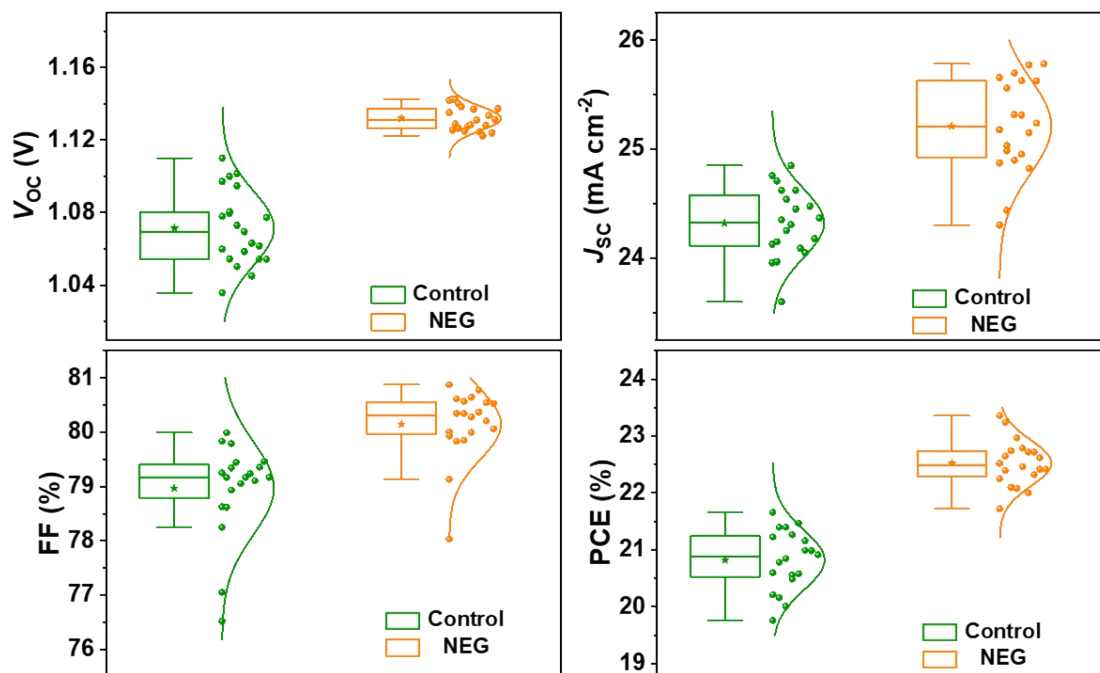

**Figure S6.** Statistical results of  $V_{OC}$ ,  $J_{SC}$ , PCE and FF based on 20 cells.

**Table S3.** Photovoltaic parameters of the Pero-SCs under reverse scan (RS) and forward scan (FS) directions.

| Device  |    | $V_{OC}$ (V) | $J_{SC}$ ( $\text{mA cm}^{-2}$ ) | FF (%) | PCE (%) |
|---------|----|--------------|----------------------------------|--------|---------|
| Control | FS | 1.09         | 25.59                            | 78.2   | 21.79   |
|         | RS | 1.01         | 25.16                            | 75.5   | 19.14   |
| NEG     | FS | 1.16         | 25.43                            | 78.3   | 23.20   |
|         | RS | 1.14         | 25.03                            | 76.9   | 22.01   |

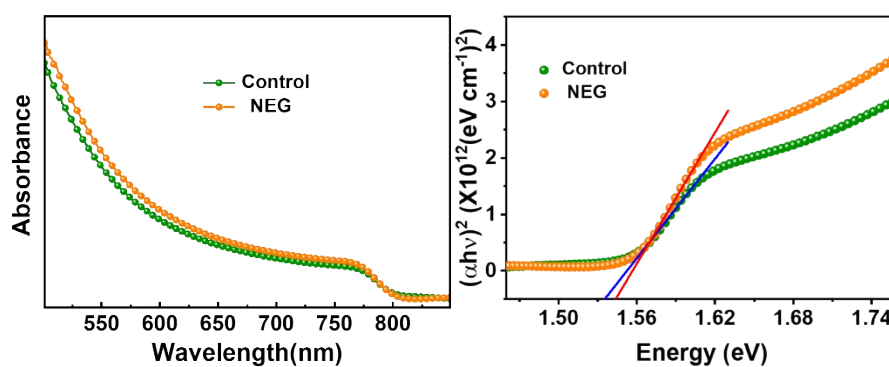

**Figure S7.** UV-vis spectra and Tauc plots for the control and perovskite films prepared with NEG.

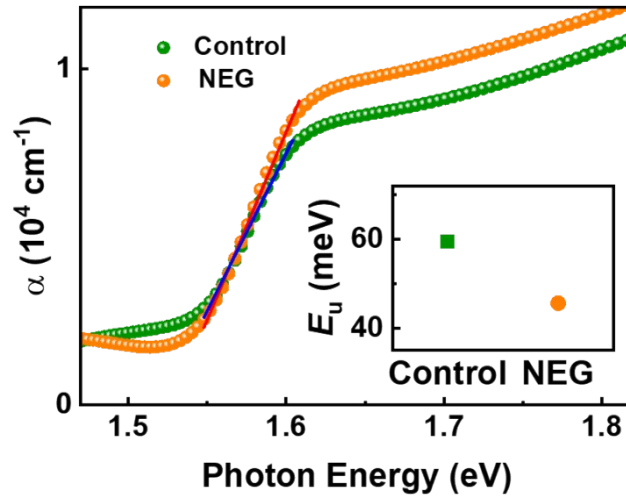

**Figure S8.** Plots of the absorption coefficient versus the photon energy for the control and perovskite film with NEG. The inset shows an estimated Urbach energy ( $E_u$ ).

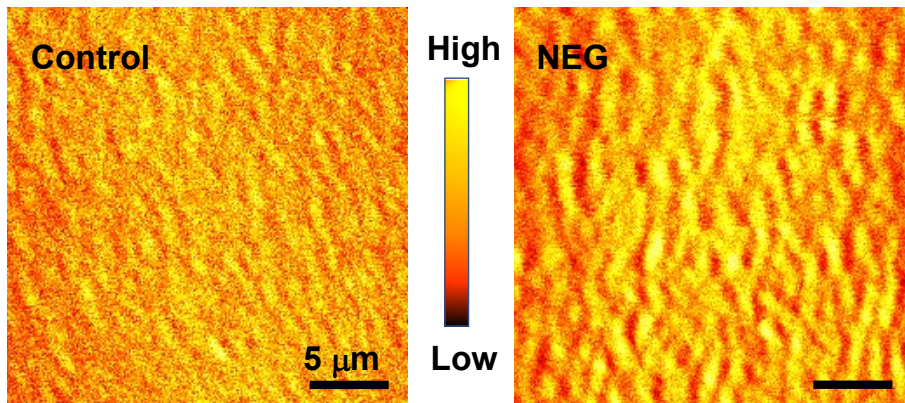

**Figure S9.** CLSM images of control and perovskite films prepared with NEG.

**Table S4.** Fitted parameters from TRPL spectra for perovskite films.

| Device  | $\tau_1$ (ns) | $\tau_2$ (ns) | $\tau_{ave}$ (ns) | $f_1$ (%) | $f_2$ (%) |
|---------|---------------|---------------|-------------------|-----------|-----------|
| Control | 21.08         | 483.32        | 447.41            | 7.78      | 98.22     |
| NEG     | 35.87         | 578.54        | 557.28            | 3.91      | 96.09     |

**Table S5.** Fitted parameters from ACIS of the Pero-SCs.

| Device  | $R_s$ ( $\Omega$ ) | $R_{tr}$ ( $\Omega$ ) | $C_{tr}$ (F)         | $R_{rec}$ ( $\Omega$ ) | $C_{rec}$ (F)        |
|---------|--------------------|-----------------------|----------------------|------------------------|----------------------|
| Control | 27.4               | 67.0                  | $8.0 \times 10^{-9}$ | 1.6                    | $1.6 \times 10^{-6}$ |
| NEG     | 28.0               | 59.4                  | $9.9 \times 10^{-7}$ | 7.6                    | $7.6 \times 10^{-8}$ |

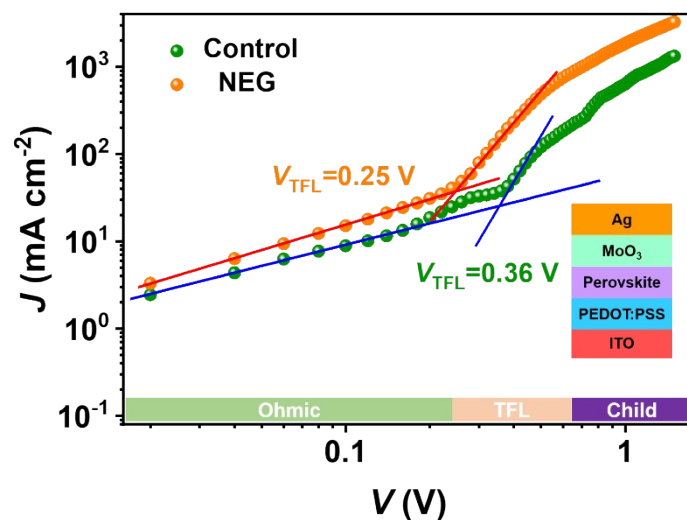

**Figure S10.**  $J$ - $V$  curves measured in the dark of hole-only devices prepared using control and films prepared with NEG for SCLC analysis.

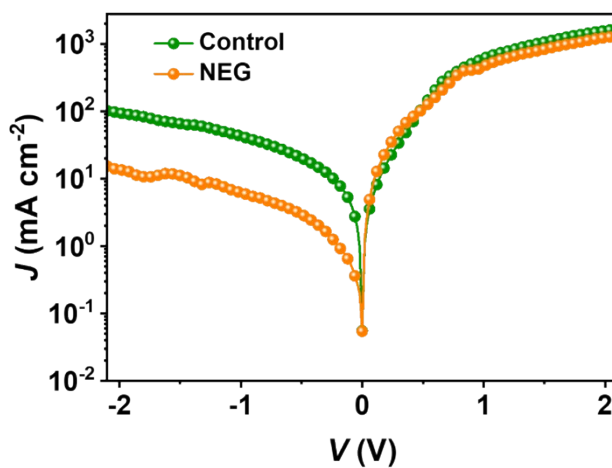

**Figure S11.**  $J$ - $V$  curves of Pero-SCs measured in the dark.

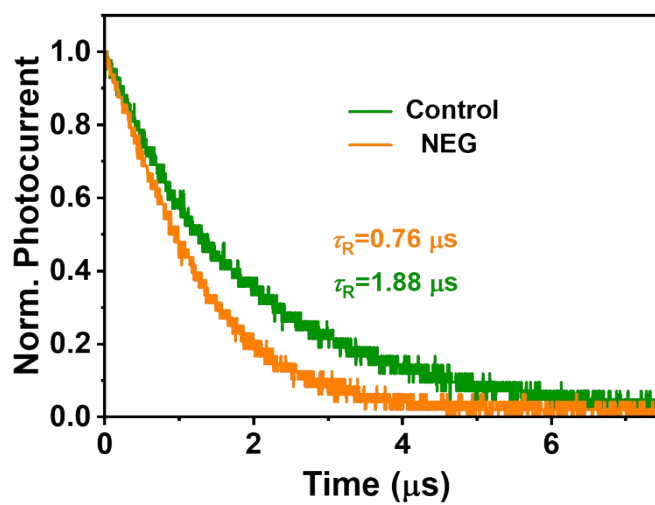

**Figure S12.** Normalized TPC decay curves of Pero-SCs.

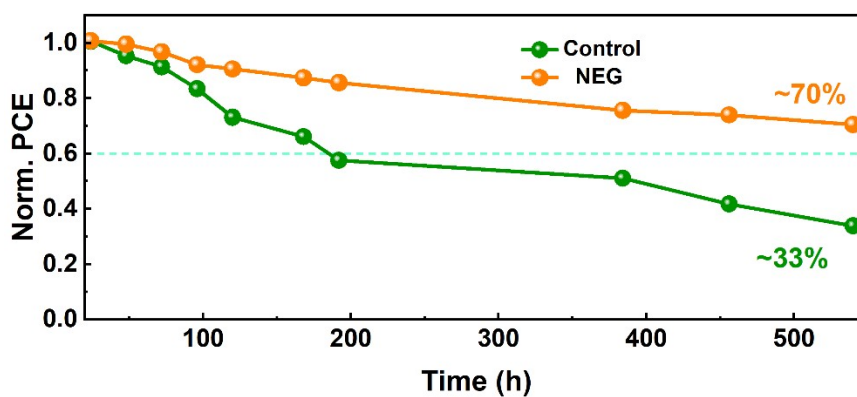

**Figure S13.** PCE evolution of the unencapsulated devices under 20% RH at 25 °C in the dark.

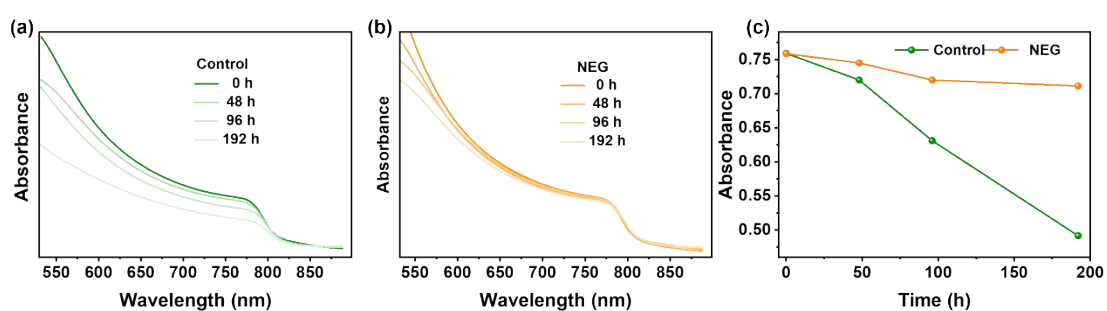

**Figure S14.** The UV-vis spectra for (a) the control and (b) the perovskite film prepared with NEG at 85 °C in the N<sub>2</sub> glovebox for 192 h, and (c) time dependence curves of the absorbance were monitored at 778 nm for the control film and perovskite film prepared with NEG.

## References

1. S. Wang, J. Jin, Y. Qi, P. Liu, Y. Xia, Y. Jiang, R. X. He, B. Chen, Y. Liu and X. Z. Zhao, *Adv. Funct. Mater.*, 2019, **30**, 1908343.
2. E. A. Alharbi, T. P. Baumeler, A. Krishna, A. Y. Alyamani, F. T. Eickemeyer, O. Ouellette, L. Pan, F. S. Alghamdi, Z. Wang, M. H. Alotaibi, B. Yang, M. Almalki, M. D. Mensi, H. Albrithen, A. Albadri, A. Hagfeldt, S. M. Zakeeruddin and M. Grätzel, *Adv. Energy Mater.*, 2021, **11**, 2003785.
3. L. Xie, K. Lin, J. Lu, W. Feng, P. Song, C. Yan, K. Liu, L. Shen, C. Tian and Z. Wei, *J. Am. Chem. Soc.*, 2019, **141**, 20537-20546.
4. F. Qiu, J. Sun, Z. Zhang, T. Shen, H. Liu and J. Qi, *Mater. Today Energy*, 2021, **21**, 100837.
5. Y. Zhao, H. Tan, H. Yuan, Z. Yang, J. Z. Fan, J. Kim, O. Voznyy, X. Gong, L. N. Quan, C. S. Tan, J. Hofkens, D. Yu, Q. Zhao and E. H. Sargent, *Nat. Commun.*, 2018, **9**, 1607.
6. C. Luo, G. Zheng, F. Gao, X. Wang, Y. Zhao, X. Gao and Q. Zhao, *Joule*, 2022, **6**, 240-257.
